# Supplementary material for: Overexpression of Arachis hypogaea AREB1 Gene Enhances Drought Tolerance by Modulating ROS Scavenging and Maintaining Endogenous ABA Content
Source: PubMed Central journal article supplement (PMC3709814; doi:10.3390/ijms140612827), 2013-06-19
Supplement: ijms-14-12827-s001.pdf [file ijms-14-12827-s001.pdf]

## Supplementary File 1

**Figure S1.** Growth phenotype of plants. (A) Eight-week-old of Wild-type (*WT*), *abi5* (abscisic acid-insensitive mutant 5, *abi5*), *AhAREBI*-overexpressed plants (*A22*, *A38*, *A39*) and *AhAREBI*-transformed in *abi5* mutant plants (*T-abi5*) grown under normal condition; (B) Two-week-old seedlings of *WT*, *A22*, *A38*, *A39*, *abi5* and *T-abi5* plants grown on MS plate under normal condition. There was no significantly difference growth phenotype between transgenic plants and WT at seedlings stage, but slight growth inhibition was observed in *A38* and *A39* plants on the soil-grown after 6 weeks.

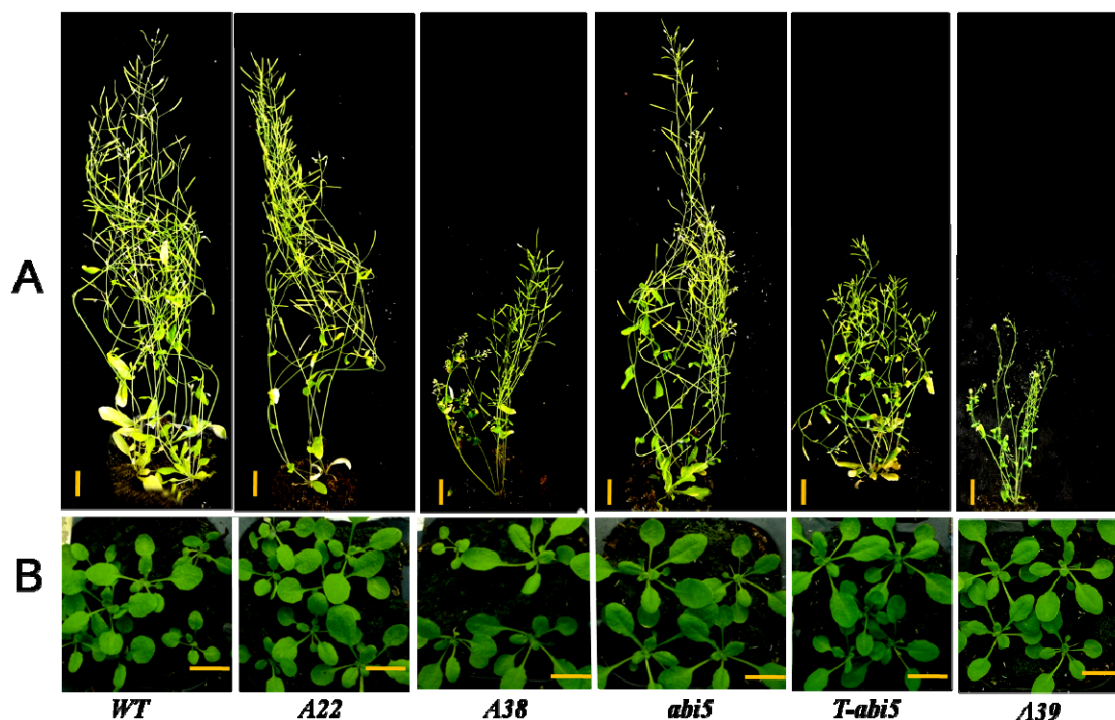

**Table S1.** Number, length and width of laminas in WT and transgenic *Arabidopsis*.

| Line          | No. of rosulate leaf | Average leaf length (cm) | Average leaf width (cm) | Plant height (cm) |
|---------------|----------------------|--------------------------|-------------------------|-------------------|
| <i>WT</i>     | 10.3 ± 0.6           | 1.1 ± 0.41               | 0.6 ± 0.31              | 27.6 ± 2.0        |
| <i>A22</i>    | 11.1 ± 0.7           | 1.1 ± 0.28               | 0.7 ± 0.24              | 26.7 ± 1.1        |
| <i>A38</i>    | 8.9 ± 1.0            | 0.8 ± 0.23 *             | 0.5 ± 0.42 *            | 21.5 ± 0.5 *      |
| <i>A39</i>    | 9 ± 0.6              | 0.9 ± 0.14 *             | 0.6 ± 0.32 *            | 23.5 ± 0.2 *      |
| <i>Abi5</i>   | 10.0 ± 0.8           | 1.0 ± 0.21               | 0.6 ± 0.22              | 25.5 ± 0.5        |
| <i>T-abi5</i> | 9.9 ± 0.9            | 0.88 ± 0.33 *            | 0.65 ± 0.12 *           | 24.5 ± 0.45 *     |

An asterisk (\*) is used especially to indicate the significant difference ( $p < 0.05$ ). All experiments were performed in triplicate and 20 plants at least were chosen at random to use for every lines.

**Figure S2.** Go annotation results of microarray expression analysis.

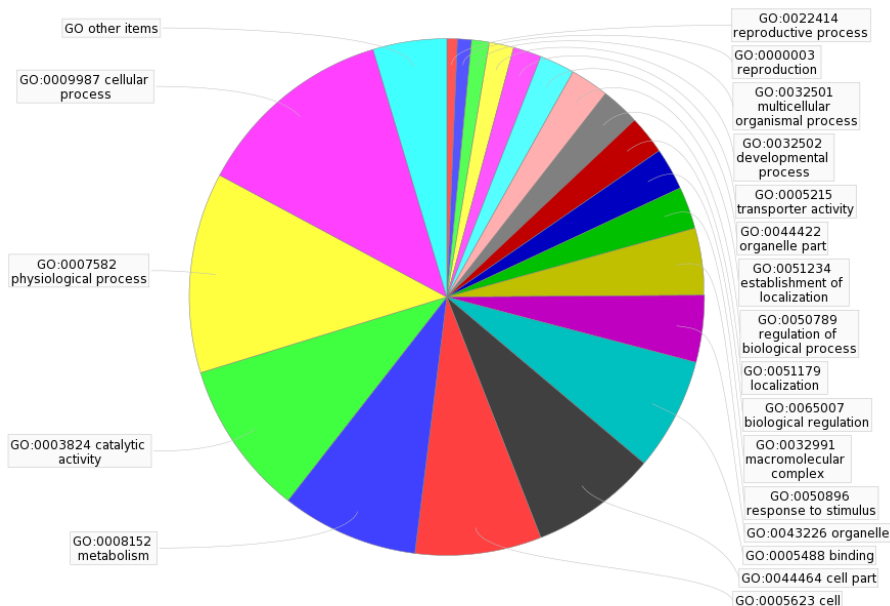

**Figure S3.** Regulation of differential expression of related genes to environmental cues.

(A) The meta-profile analysis of the changes in transcript abundance of the 9 related genes in response to different stresses or environmental cues was established with the Geneinvestigator database (off note, *AtHSD2* was not found in geneinvestigator database). The gene expression responses are calculated as log<sub>2</sub>-ratios between signal intensities from different stress or environmental treatments compared to control or mock-treated samples. The resulting heatmap is color coded as indicated and reflects up-regulated (red color) or down-regulated (green color) genes. A grey color indicates that gene expression was not detectable in both treatment and control conditions; (B) Core motif of ABRE element in the promoters of these genes, shole promoter sequence were searched in both the forward and reverse strands of the promoter regions and distributed evenly. The red triangle indicated the direction of ABRE element.

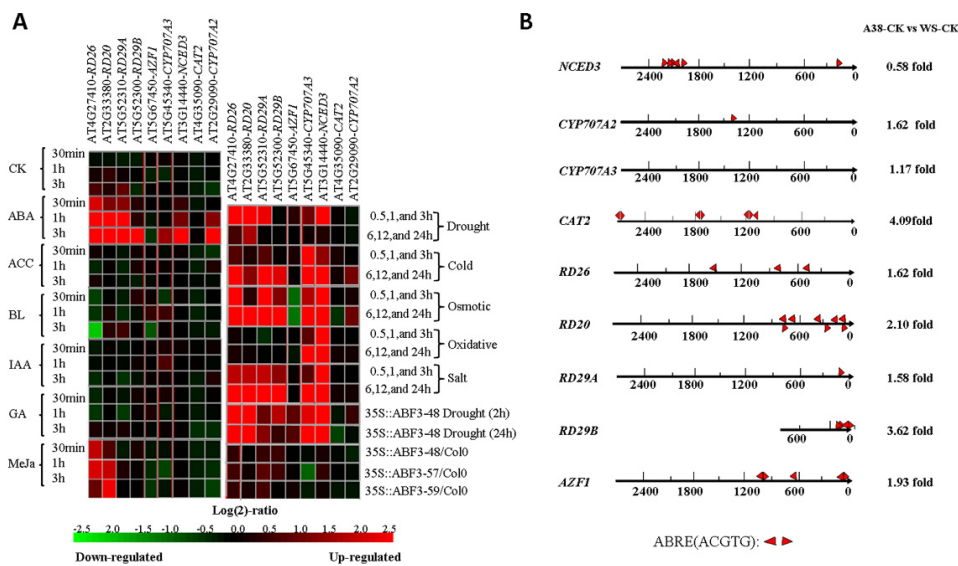

**Figure S4.** Subcellular localization of AhAREB1 protein in transgenic *Arabidopsis*. AhAREB1-GFP fusion proteins (A) or GFP control proteins (B) were expressed in *35S:AhAREB1-GFP* or *35S:GFP* transgenic *Arabidopsis*. Root from two-week-old seedlings was observed using a confocal laser scanning microscopy (LSM 510 MET, Zeiss, Zeiss, Jenaer, Germany). (A,B) Fluorescent field of GFP; (C,D) Bright field.

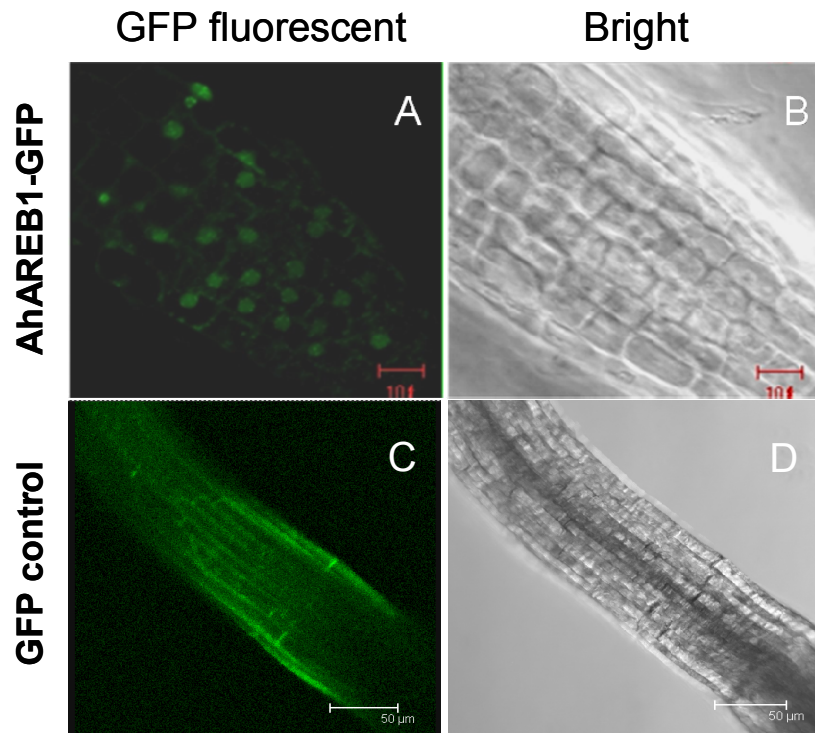

**Table S2.** Difference expression genes.

| Gene ID   | Gene symbol | A38-CK vs. WT-CK | A38_Dry vs. A38_CK | WT_Dry vs. WT_CK | A38_Dry vs. WT_Dry |
|-----------|-------------|------------------|--------------------|------------------|--------------------|
| AT4G35090 | CAT2        | 7.53 *           | 2.51               | 4.09             | 5.95               |
| AT5G18100 | CSD3        | 1.96             | -                  | -                | -                  |
| AT1G12520 | ATCCS       | 1.68             | 0.47               | -                | -                  |
| AT5G67030 | ABA1        | 1.56             | -                  | -                | -                  |
| AT1G16540 | ABA3        | 2.18             | -                  | -                | -                  |
| AT3G14440 | NCED3       | 0.48             | 10.88              | 4.96             | 0.50               |
| AT1G15520 | AtABCG40    | 0.49             | -                  | -                | -                  |
| AT2G29090 | CYP707A2    | 1.72             | 2.30               | 2.85             | 1.54               |
| AT5G52310 | RD29A       | 1.58             | 6.29               | 19.17            | 0.59               |
| AT5G52300 | RD29B       | 3.62             | 7.60               | 20.47            | -                  |
| AT4G27410 | RD26        | 1.94             | 24.70              | 16.39            | -                  |
| AT2G33380 | RD20        | 2.10             | 5.63               | 12.98            | -                  |

\* fold change. - no significant difference.

**Table S3.** Primers for this study.

| <b>Primer name</b> | <b>Primer sequence (5' to 3')</b> |
|--------------------|-----------------------------------|
| smRT-AhAREB1-F     | ATGAACTTCAGGGGCTATGGTGAT          |
| smRT-AhAREB1-R     | CTACCAGGGACCTGTAAGTGCCTT          |
| RD26-F             | TTACGGTGGTTACGATGCG               |
| RD26-R             | GAAACACCAAACCCACTCG               |
| NCED3-F            | CGGACGGAACTAAATCACC               |
| NCED3-R            | TCCCGAATCTTGCGACCTT               |
| real-AhAREB1-F     | ACAAGGGCAACCAGCATTAGG             |
| real-AhAREB1-R     | TCACCACCACCATAACCAACCA            |
| RD20-F             | AGGAAGGTATGTCCAGTT                |
| RD20-R             | CGATTTCCCTCGGTTACAT               |
| CYP707A2-F         | CACCACCGCTTCTGTCTTAAC             |
| CYP707A2-R         | TGCTGCTCTTAGTGTCTCTTGT            |
| ATHSD2-F           | GGCAAGCGTCTATTCAGCAA              |
| ATHSD2-R           | TGAGGAGTGGTCATATCCGTAG            |
| CAT2-F             | GTGTCTTCTCCTATGCCGATAC            |
| CAT2-R             | ATGGTGGTTGTTGTGGTGAG              |
| CYP707A3-F         | TGTCCAGGCAATGAGTTAGC              |
| CYP707A3-R         | CCAAGGCAATAGGCAATCCA              |
| RD29A-F            | ATCACTTGGCTCCACTGTTGTTT           |
| RD29A-R            | ACAAAACACACATAAACATCCAAAGT        |
| RD29B-F            | AAAACGTTTGGAGGAAGATCC             |
| RD29B-R            | GGTACTCCAGCTTCTCCACCT             |
| 18SrRNA-F          | TACGTCCCTGCCCTTTGTAC              |
| 18SrRNA-R          | CCTACGGAAACCTTGTTACGAC            |

© 2013 by the authors; licensee MDPI, Basel, Switzerland. This article is an open access article distributed under the terms and conditions of the Creative Commons Attribution license (<http://creativecommons.org/licenses/by/3.0/>).
